# Supplementary material
Source: publisher figshare collection journal article supplement (https://diabetesjournals.figshare.com/ndownloader/files/25950602)
Supplement: Supplementary file 1 [file 25950602]

**Supplementary Table S1**

Univariate Cox proportional analysis (Fine-Gray sub distribution hazard model) showing predictors for fatal/nonfatal cardiovascular events in univariate models in patients with T2DM and various degrees of renal function.

| **Cardiovascular events** | | | |
| --- | --- | --- | --- |
| *Variables (units of measurement)* | *SHR* | *95% CI* | *P* |
|  | | | |
| Hemoglobin (g/dl) | 0.85 | 0.74-0.98 | **0.02** |
| EGFR (ml/min/1.73 m2) | 0.98 | 0.97-0.99 | **<0.0001** |
| Gender (female) | 0.50 | 0.30-0.82 | **0.006** |
| T2DM duration (years) | 1.03 | 1.00-1.06 | **0.04** |
| History of CV events (yes) | 5.47 | 2.45-12.23 | **<0.0001** |
| Albumin (g/dl) | 0.43 | 0.26-0.74 | **0.002** |
| HDL cholesterol (mg/dl) | 0.97 | 0.95-0.99 | **0.02** |
| UPCR (g/g) | 1.36 | 1.22-1.51 | **<0.0001** |
| UACR (mg/g) | 1.01 | 1.00-1.01 | **<0.0001** |
| CIMT (mm) | 7.45 | 3.46-16.04 | **<0.0001** |

*SHR, Sub Hazard Ratio; CI, Confidence Interval; eGFR, Estimated Glomerular Filtration Rate; T2DM, Type 2 Diabetes Mellitus; CV, Cardiovascular; HDL, High-Density Lipoprotein;* *UPCR, Urinary Protein-Creatinine Ratio; UACR, Urinary Albumin-Creatinine Ratio; cIMT, Carotid Intima-Media Thickness.*
